# Supplementary material for: DeepSwarm: towards swarm deep learning with bi-directional optimization of data acquisition and processing
Source: Springer Nature journal article supplement (doi:10.1007/s11704-024-40465-z), 2024-11-20

# DeepSwarm: Towards Swarm Deep Learning with Bi-directional Optimization of Data Acquisition and Processing

Sicong LIU, Bin GUO, Ziqi WANG, Lehao WANG, Zimu ZHOU, Xiaochen LI, Zhiwen YU

Frontiers of Computer Science, DOI: [10.1007/s11704-024-40465-z](https://doi.org/10.1007/s11704-024-40465-z)

**Current Problem:** The rise of on-device deep learning (DL) in resource-limited mobile and embedded devices has stimulated various applications. However, existing on-device DL mostly relies on predefined processing patterns for reacting to given input data, **resulting in accuracy and resource efficiency bottlenecks.**

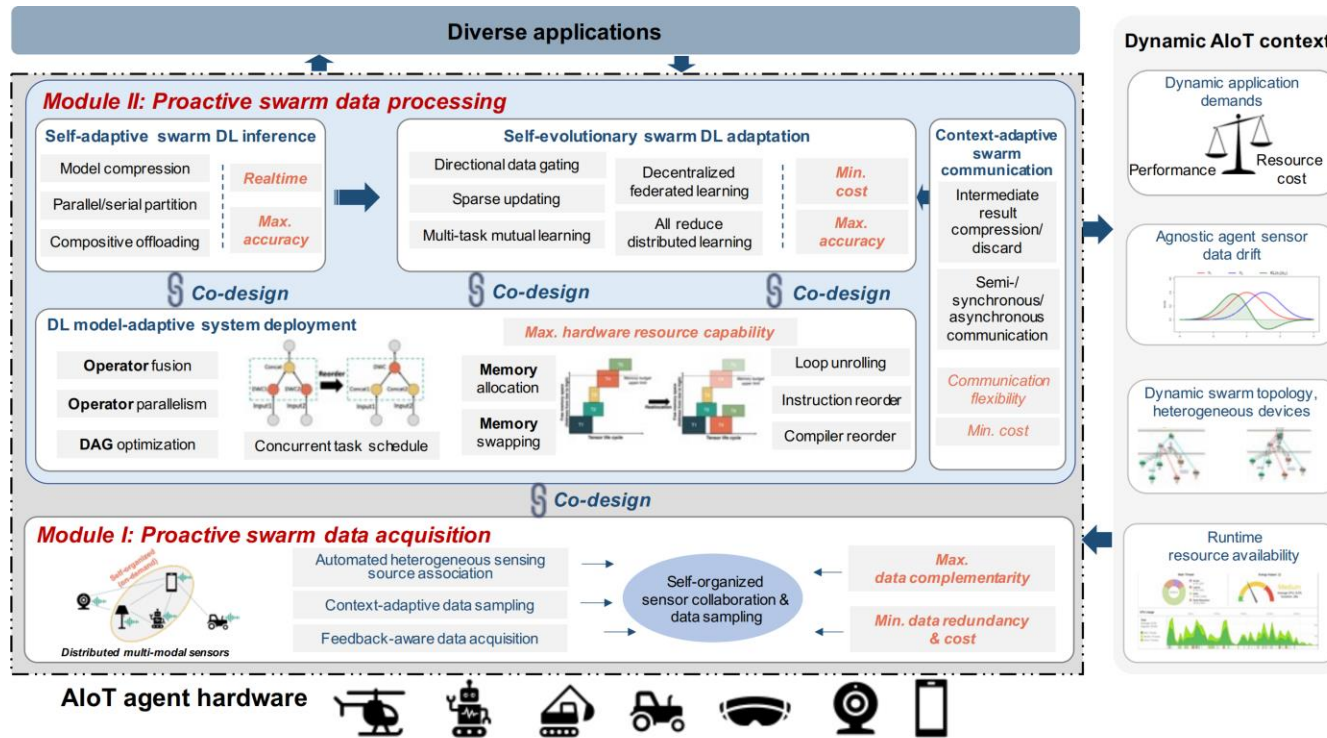

**Our thoughts:**

- ✓ DeepSwarm **incorporates proactive data acquisition and processing** with bi-directional optimization to minimize redundancy and enhance resource efficiency.
- ✓ It promptly addresses **data limitations and redundancy through DL feedback**, capitalizing on the complementary and asynchronous nature of data for scalable processing.

**Deep Swarm**

**DeepSwarm for Swarm DL Adaptation:** Compared with the original model of the mobile model, DeepSwarm has improved the average accuracy by more than 40%, and compared with the global model, it has improved by 9%.

| Method                          | Accuracy gain of global model | Accuracy of mobile model after adaptation |                |                |         | Accuracy gain of mobile model |                |                |         |
|---------------------------------|-------------------------------|-------------------------------------------|----------------|----------------|---------|-------------------------------|----------------|----------------|---------|
|                                 | IoU = 0.5                     | IoU = 0.50                                |                |                |         | IoU = 0.50                    |                |                |         |
|                                 |                               | Mobile model A                            | Mobile model B | Mobile model C | Average | Mobile model A                | Mobile model B | Mobile model C | Average |
| Domain adaptation               | None                          | 0.504                                     | 0.469          | 0.497          | 0.49    | 14.3%                         | 48.9%          | 13.7%          | 23.4%   |
| NestEvo without data generation | 1.3%                          | 0.504                                     | 0.475          | 0.501          | 0.505   | 14.3%                         | 50.8%          | 15.5%          | 27.2%   |
| Original mobile model           | None                          | 0.441                                     | 0.315          | 0.437          | 0.397   | None                          |                |                |         |
| Only mobile model adaptation    | 0                             | 0.501                                     | 0.478          | 0.493          | 0.491   | 13.6%                         | 51.7%          | 12.8%          | 23.7%   |
| NestEvo                         | 9.13%                         | 0.571                                     | 0.543          | 0.584          | 0.566   | 29.5%                         | 72.4%          | 33.6%          | 42.6%   |

**DeepSwarm for Asynchronous Personalized FL:** The results showed that DeepSwarm achieves a reduction of up to 88.2% in convergence time, and an improvement of up to 46% in accuracy.

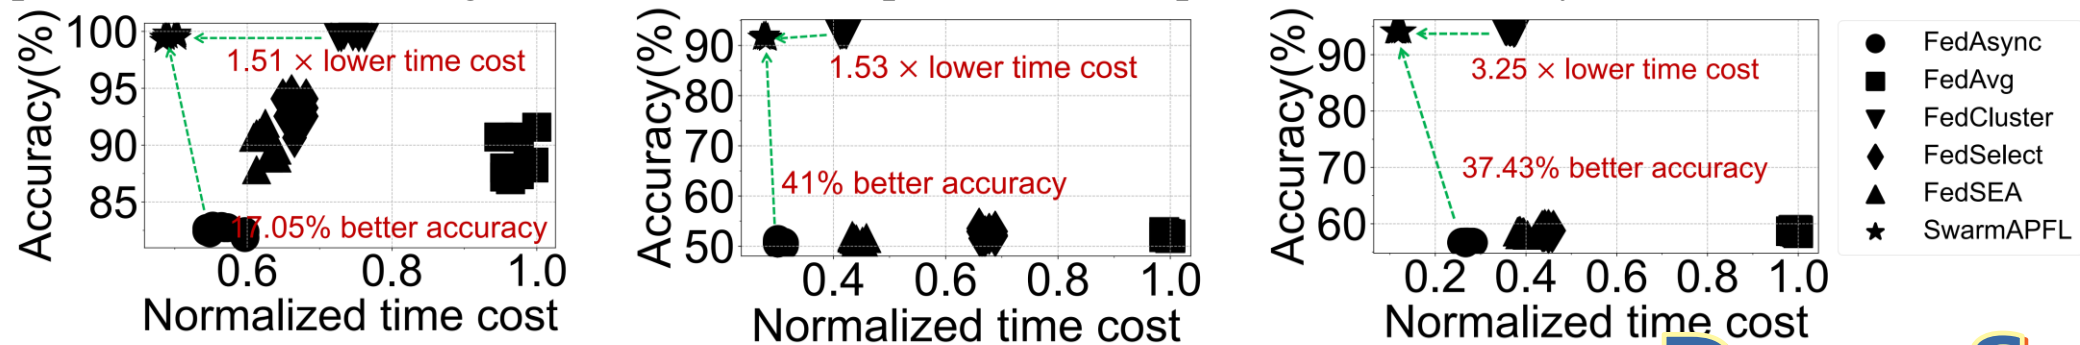

Supplement: 11704_2024_40465_MOESM1_ESM.pdf [file 11704_2024_40465_MOESM1_ESM.pdf]
